# Supplementary material for: In silico analysis reveals widespread presence of three gene families, MAPK, MAPKK and MAPKKK, of the MAPK cascade from crop plants of Solanaceae in comparison to the distantly-related syntenic species from Rubiaceae, coffee
Source: PeerJ. 2017 Jun 6;5:e3255. doi: 10.7717/peerj.3255 (PMC5463992; doi:10.7717/peerj.3255)
Supplement: Table S1 [file peerj-05-3255-s021.xlsx]

## Sheet: Additional File 2
Gene name	Gene locus	Position	Strand dir	Gene size (bp)	Exons	CDS (bp)	Protein (aa)*	Predicted pI	Predicted MW av. (kDa)	Predicted Subcellular localization
Tomato
SlMPK8-1	Solyc04g007710.2.1	SL2.40ch04:1389688-1396477	R	6790	11	1539	512	6.86	58.42	Cytoplasmic
										Nuclear
SlMPK8-2	Solyc05g008020.2.1	SL2.40ch05:2439987-2443704	F	3718	11	1542	513	5.88	58.8	Nuclear
SlMPK9-1	Solyc12g040680.1.1	SL2.40ch12:40280910-40287741	F	6832	11	1728	575	6.49	65.7	Nuclear
SlMPK9-2	Solyc06g068990.2.1	SL2.40ch06:39197548-39203557	F	6010	11	1806	601	7.68	68.5	Nuclear
										Cytoplasmic
SlMPK16	Solyc01g080240.2.1	SL2.40ch01:71971471-71978931	F	7461	10	1698	565	8.85	64.37	Cytoplasmic
										Nuclear
SlMPK20	Solyc07g056350.2.1	SL2.40ch07:61549395-61555184	F	5790	10	1866	621	9.18	70.55	Nuclear
SlMPK19-1	Solyc10g007500.2.1	SL2.40ch10:1832683-1838376	R	5694	10	1782	593	9.17	67.15	Nuclear
										Mitochondrial
SlMPK19-2	Solyc07g062080.2.1	SL2.40ch07:62129987-62135063	F	5077	10	1803	600	9.4	68.01	Nuclear
										Mitochondrial
SlMPK1	Solyc04g080730.2.1	SL2.40ch04:62421080-62429518	F	8439	2	1119	372	6.32	42.8	Nuclear
SlMPK14	Solyc02g084870.2.1	SL2.40ch02:42513397-42516636	R	3240	2	1113	370	8.28	42.68	Nuclear
										Mitochondrial
SlMPK3	Solyc06g005170.2.1	SL2.40ch06:192235-195321	F	3087	6	1122	373	5.45	42.8	Cytoplasmic
SlMPK13	Solyc11g072630.1.1	SL2.40ch11:52945837-52949594	F	3758	6	1119	372	4.97	42.66	Cytoplasmic
SlMPK4-1	Solyc08g081490.2.1	SL2.40ch08:61696989-61700296	R	3308	6	1140	379	5.84	43.57	Cytoplasmic
										Nuclear
										Mitochondrial
SlMPK4-2	Solyc01g094960.2.1	SL2.40ch01:78118441-78124258	F	5818	6	1122	373	5.97	42.92	Cytoplasmic
										Nuclear
										Mitochondrial
Potato
StMPK8-1	PGSC0003DMP400010572	ST3.10ch04:2,185,820..2,194,214	R	8395	11	1539	512	6.87	58.3	Cytoplasmic
	PGSC0003DMT400015265									Nuclear
StMPK8-2	PGSC0003DMP400010570	ST3.10ch04:2,185,820..2,194,214	R	8395	10	1488	495	6.61	56.45	Cytoplasmic
	PGSC0003DMT400015263
StMPK8-3	PGSC0003DMP400053050	ST3.10ch05:4,324,472..4,327,488	R	3017	10	1536	511	6.01	58.65	Nuclear
	PGSC0003DMT400078323
StMPK9-1	PGSC0003DMP400004339	ST3.10ch12:39,794,275..39,801,708	R	-	11	1728	575	6.47	65.7	Nuclear
	PGSC0003DMT400006281
StMPK9-2	PGSC0003DMP400050161	ST3.10ch06:50,702,126..50,708,855	F	6730	11	1818	605	7.07	69.04	Nuclear
	PGSC0003DMT400074096
StMPK16-1	PGSC0003DMP400007748	ST3.10ch01:61,220,213..61,228,175	R	7963	7	1260	419	8.37	48.38	Cytoplasmic
	PGSC0003DMT400011136
StMPK16-2	PGSC0003DMP400007750	ST3.10ch01:61,220,213..61,228,175	R	7963	10	1698	565	8.85	64.38	Nuclear
	PGSC0003DMT400011138									Cytoplasmic
StMPK20-1	PGSC0003DMP400030311	ST3.10ch07:51,103,363..51,109,083	R	5721	10	1839	612	9.25	69.64	Nuclear
	PGSC0003DMT400044710
StMPK20-2	PGSC0003DMP400030310	ST3.10ch07:51,103,363..51,109,083	R	5721	10	1842	613	9.25	69.71	Nuclear
	PGSC0003DMT400044709
StMPK20-3	PGSC0003DMP400030312	ST3.10ch07:51,103,363..51,109,083	R	5721	9	1431	476	9.09	54.98	Nuclear
	PGSC0003DMT400044711
StMPK19-1	PGSC0003DMP400036823	ST3.10ch10:2,532,726..2,538,449	R	5724	10	1782	593	9.22	67.18	Nuclear
	PGSC0003DMT400054750									Mitochondrial
StMPK19-2	PGSC0003DMP400036824	ST3.10ch10:2,534,669..2,538,449	R	5724	4	663	220	9.06	25.6	Cytoplasmic
	PGSC0003DMT400054751
StMPK19-3	PGSC0003DMP400012516	ST3.10ch07:52,242,138..52,246,765	F	5804	8	1284	427	9.03	49.32	Cytoplasmic
	PGSC0003DMT400018187
StMPK19-4	PGSC0003DMP400012517	ST3.10ch07:52,242,138..52,247,941	F	5804	10	1812	603	9.37	68.23	Nuclear
	PGSC0003DMT400018188									Mitochondrial
StMPK1	PGSC0003DMP400006600	ST3.10ch04:70,128,849..70,135,707	F	6859	2	1119	372	6.32	42.83	Nuclear
	PGSC0003DMT400009491
StMPK14	PGSC0003DMP400006283	ST3.10ch02:40,116,542..40,120,342	R	3801	2	1113	370	8.02	42.71	Nuclear
	PGSC0003DMT400009066									Mitochondrial
StMPK3-1	PGSC0003DMP400052344	ST3.10ch06:7,463,480..7,467,923	F	-	6	1122	373	5.53	42.89	Cytoplasmic
	PGSC0003DMT400077272
StMPK3-2	PGSC0003DMP400052345	ST3.10ch06:7,463,480..7,466,230	F	-	5	981	326	6.46	37.52	Cytoplasmic
	PGSC0003DMT400077273
StMPK13	PGSC0003DMP400044003	ST3.10ch11:44,614,397..44,619,341	F	-	6	1119	372	4.97	42.69	Cytoplasmic
	PGSC0003DMT400065261
StMPK4-1	PGSC0003DMP400021542	ST3.10ch08:55,186,212..55,190,914	R	4703	6	1140	379	5.91	43.46	Cytoplasmic
	PGSC0003DMT400031773									Nuclear
										Mitochondrial
StMPK4-2	PGSC0003DMP400000144	ST3.10ch01:72,545,014..72,551,760	F	6747	6	1122	373	5.86	42.82	Cytoplasmic
	PGSC0003DMT400000192									Nuclear
										Mitochondrial
Eggplant
SmMPK8-1	Sme2.5_02168.1_g00005.1	-	-	-	10	1530	509	7.29	58.34	Cytoplasmic
SmMPK8-2	Sme2.5_01704.1_g00002.1	-	-	-	10	1443	480	6.99	54.93	Nuclear
SmMPK9	Sme2.5_01256.1_g00004.1	-	-	-	11	1719	572	6.57	64.94	Nuclear
SmMPK16	Sme2.5_01583.1_g00001.1	-	-	-	11	1713	570	8.82	64.07	Cytoplasmic
SmMPK20	Sme2.5_00135.1_g00022.1	-	-	-	10	2319	772	8.68	87.27	Cytoplasmic
										Nuclear
SmMPK19-1	Sme2.5_01907.1_g00007.1	-	-	-	10	1821	606	9.31	68.61	Mitochondrial
										Nuclear
SmMPK19-2	Sme2.5_01196.1_g00004.1	-	-	-	9	1812	603	9.42	68.43	Mitochondrial
										Nuclear
										Cytoplasmic
SmMPK1	Sme2.5_02990.1_g00003.1	-	-	-	2	1119	372	6.32	42.7	Nuclear
SmMPK14	Sme2.5_00629.1_g00003.1	-	-	-	2	1113	370	7.19	42.72	Nuclear
SmMPK13	Sme2.5_00256.1_g00002.1	-	-	-	6	1191	396	5.11	45.54	Cytoplasmic
										Nuclear
SmMPK4-1	Sme2.5_04459.1_g00002.1	-	-	-	5	942	313	5.41	35.78	Cytoplasmic
										Plasma
										Membrane
										Mitochondrial
SmMPK4-2	Sme2.5_05755.1_g00007.1	-	-	-	6	1122	373	6.02	42.98	Cytoplasmic
										Nuclear
										Mitochondrial
Pepper
CaMPK8-1	CA05g08630	Pepper.v.1.55.chr05:67468808..67475261	F	6454	9	1482	493	7	56.3	Cytoplasmic
CaMPK8-2	CA00g57490	-	-	-	-	1704	567	7.21	64.75	Cytoplasmic
CaMPK9-1	CA12g10140	Pepper.v.1.55.chr12:78469839..78474912	F	5074	5	1098	365	7.24	41.86	Plasma Membrane
										Cytoplasmic
CaMPK9-2	CA06g17760	Pepper.v.1.55.chr06:216070086..216075975	F	5890	8	1653	550	8.28	63.08	Cytoplasmic
										Nuclear
CaMPK16	CA01g24290	Pepper.v.1.55.chr01:192066037..192070249	F	4213	7	1260	419	8.37	48.38	Cytoplasmic
CaMPK20	CA07g15380	Pepper.v.1.55.chr07:217189491..217192973	R	3483	9	1860	619	9.14	70.36	Nuclear
CaMPK19-1	CA10g01850	Pepper.v.1.55.chr10:3904073..3908183	R	4111	9	1809	602	9.09	68.24	Nuclear
										Mitochondrial
CaMPK19-2	CA07g16590	Pepper.v.1.55.chr07:221712314..221715958	F	3645	9	1884	627	9.25	70.71	Nuclear
CaMPK1	CA04g21490	Pepper.v.1.55.chr04:218599170..218603799	R	4630	2	1119	372	6.32	42.76	Nuclear
CaMPK14	CA02g22080	Pepper.v.1.55.chr02:156967714..156970175	R	2462	2	1113	370	8.29	42.74	Nuclear
										Mitochondrial
CaMPK3	CA06g06270	Pepper.v.1.55.chr06:59521988..59525433	F	3446	6	1128	375	5.4	42.93	Cytoplasmic
CaMPK13	CA11g13970	Pepper.v.1.55.chr11:228132171..228137306	R	5136	5	990	329	6.11	37.73	Nuclear
										Cytoplasmic
CaMPK4-1	CA01g02140	Pepper.v.1.55.chr01:3173279..3177283	F	4005	6	1140	379	6.18	43.68	Cytoplasmic
CaMPK4-2	CA08g07540	Pepper.v.1.55.chr08:124018835..124024649	F	5815	6	1122	373	5.97	42.92	Nuclear
										Cytoplasmic
										Mitochondrial
Coffee
CcMPK8	Cc11_g08590	chr11:25970429..25976017	F	5589	10	1302	433	8.16	49.43	Nuclear
										Cytoplasmic
CcMPK9	Cc04_g06490	chr4:4915795..4922581	F	6787	11	1782	593	7.72	67.52	Nuclear
CcMPK16	Cc03_g02990	chr3:2247346..2253251	R	5906	10	1695	564	8.96	64.17	Cytoplasmic
										Nuclear
CcMPK20	Cc05_g09440	chr5:23921381..23927510	R	6130	10	1872	623	9.19	70.8	Nuclear
										Cytoplasmic
CcMPK19	Cc05_g10580	chr5:24906197..24912604	F	6408	10	1863	620	9.25	70.2	Nuclear
CcMPK1	Cc03_g12110	chr3:19005537..19013461	R	7925	2	774	257	5.12	29.45	Nuclear
CcMPK14	Cc07_g10000	chr7:7310722..7314334	F	3613	2	1131	376	7.19	42.94	Nuclear
										Plasma Membrane
CcMPK3	Cc01_g11790	chr1:30427547..30430913	R	3367	6	990	329	5.91	37.89	Cytoplasmic
CcMPK6	Cc03_g14980	chr3:30169059..30180553	F	11495	6	1212	403	5.59	46.05	Cytoplasmic
CcMPK13	Cc01_g11870	chr1:30563323..30565945	F	2623	6	1134	377	5.35	43.28	Cytoplasmic
CcMPK4-1	Cc08_g15160	chr8:29982259..29985391	R	3133	6	1152	383	6.24	43.84	Cytoplasmic
CcMPK4-2	Cc00_g17870	chr0:117998702..118006485	R	7784	6	1137	378	6.35	43.53	Nuclear
										Mitochondrial
										Cytoplasmic
