# Supplementary material for: In silico analysis reveals widespread presence of three gene families, MAPK, MAPKK and MAPKKK, of the MAPK cascade from crop plants of Solanaceae in comparison to the distantly-related syntenic species from Rubiaceae, coffee
Source: PeerJ. 2017 Jun 6;5:e3255. doi: 10.7717/peerj.3255 (PMC5463992; doi:10.7717/peerj.3255)
Supplement: Table S4 [file peerj-05-3255-s024.xlsx]

## Sheet: Sheet1
Gene name	Gene locus	Position	Strand dir	Gene size (bp)	Exons	CDS (bp)	Protein (aa)*	Predicted pI	Predicted MW av. (kDa)	Predicted Subcellular localization
Tomato
SlRaf30-1	Solyc01g111880.2.1	SL2.40ch01:89803298-89811106	R	7809	16	1692	563	5.89	63.49	Cytoplasmic
SlRaf30-2	Solyc10g055720.1.1	SL2.40ch10:52722218-52731615	R	9398	16	1692	563	5.83	63.71	Nuclear
										Cytoplasmic
SlRaf21-1	Solyc02g083290.2.1	SL2.40ch02:41311201-41321957	R	10757	16	1689	562	5.41	63.52	Nuclear
										Cytoplasmic
SlRaf21-2	Solyc12g094410.1.1	SL2.40ch12:62972424-62976753	F	4330	15	1710	569	6.34	64.34	Cytoplasmic
SlRaf21-3	Solyc04g071120.2.1	SL2.40ch04:55618968-55632414	R	13447	16	1626	541	5.15	61.01	Cytoplasmic
SlRaf37	Solyc02g085620.2.1	SL2.40ch02:43021184-43027761	R	6578	6	1116	371	5.56	41.49	Nuclear
										Cytoplasmic
										Plasma Membrane
SlRaf31	Solyc09g018060.2.1	SL2.40ch09:12708472-12715748	R	7277	6	933	310	6.73	34.74	Cytoplasmic
SlRaf34	Solyc02g093410.2.1	SL2.40ch02:48864525-48868381	F	3857	6	1062	353	6.9	39.89	Cytoplasmic
SlRaf28-1	Solyc12g009340.1.1	SL2.40ch12:2619577-2623405	F	3829	2	1203	400	7.16	44.82	Chloroplast
										Cytoplasmic
SlRaf28-2	Solyc07g042680.2.1	SL2.40ch07:53543511-53549179	F	5669	2	1239	412	7.68	46.19	Cytoplasmic
										Mitochondrial
										Nuclear
SlRaf28-3	Solyc07g042890.2.1	SL2.40ch07:53735335-53740970	F	5636	2	1239	412	8.09	46.14	Nuclear
										Mitochondrial
										Cytoplasmic
SlRaf43-1	Solyc02g078140.2.1	SL2.40ch02:37494938-37497613	R	2676	3	1515	504	9.2	57.22	Nuclear
										Mitochondrial
SlRaf43-2	Solyc03g006400.2.1	SL2.40ch03:996867-999265	R	2399	3	1443	480	9.38	54.51	Mitochondrial
SlRaf19-1	Solyc03g114310.2.1	SL2.40ch03:58374824-58379605	F	4782	3	1056	351	8.41	39.81	Cytoplasmic
SlRaf19-2	Solyc04g014690.2.1	SL2.40ch04:4951177-4954530	F	3354	3	1134	377	9.19	42.92	Nuclear
SlRaf19-3	Solyc11g012050.1.1	SL2.40ch11:4992438-4996469	F	4032	3	1125	374	9	42.83	Nuclear
SlRaf24-1	Solyc02g031860.2.1	SL2.40ch02:17793182-17800827	R	7646	6	3666	1221	5.2	134.39	Nuclear
SlRaf24-2	Solyc02g031910.2.1	SL2.40ch02:17857085-17865021	R	7937	6	3729	1242	5.14	136.51	Nuclear
SlRaf16	Solyc09g091460.2.1	SL2.40ch09:66083794-66089563	F	5770	8	3708	1235	5.46	138.07	Nuclear
SlRaf42	Solyc07g007140.2.1	SL2.40ch07:1889884-1899241	R	9358	9	4248	1415	5.33	152.91	Nuclear
SlRaf35	Solyc07g006760.2.1	SL2.40ch07:1599263-1605156	R	5894	9	3252	1083	5.28	120.45	Nuclear
SlRaf48-1	Solyc03g121780.1.1	SL2.40ch03:63894220-63896278	F	2059	6	936	311	8.89	35.43	Nuclear
SlRaf26	Solyc09g082470.2.1	SL2.40ch09:63579551-63584081	R	4531	7	1188	395	8.75	44.52	Nuclear
										Cytoplasmic
SlRaf33	Solyc12g062280.1.1	SL2.40ch12:49627152-49631145	F	3994	6	1089	362	8.26	40.78	Cytoplasmic
SlRaf38-1	Solyc06g071410.2.1	SL2.40ch06:40320383-40324461	R	4079	6	1185	394	7.95	44.06	Nuclear
SlRaf38-2	Solyc03g114210.2.1	SL2.40ch03:58256826-58261183	R	4358	6	1176	391	7.93	43.35	Nuclear
										Cytoplasmic
SlRaf17-1	Solyc05g013070.2.1	SL2.40ch05:6165906-6171636	F	5731	11	1311	436	8.16	49.2	Mitochondrial
										Cytoplasmic
SlRaf17-2	Solyc01g010950.2.1	SL2.40ch01:6505612-6517771	R	12160	11	1293	430	8.72	48.44	Cytoplasmic
										Mitochondrial
SlRaf27	Solyc10g017490.1.1	SL2.40ch10:5362924-5369956	F	7033	13	1320	439	6.17	49.61	Cytoplasmic
SlRaf11-1	Solyc01g059860.2.1	SL2.40ch01:61725129-61733391	R	8263	13	2283	760	6.52	85.11	Nuclear
SlRaf11-2	Solyc12g099250.1.1	SL2.40ch12:64789614-64795487	R	5874	13	2301	766	6.64	85.24	Nuclear
SlRaf12-1	Solyc08g080460.1.1	SL2.40ch08:60917452-60922463	F	5012	15	2271	756	7.57	84.17	Nuclear
SlRaf12-2	Solyc08g007910.2.1	SL2.40ch08:2412322-2421171	F	8850	15	2172	723	6.29	80.96	Nuclear
SlRaf15-1	Solyc07g055130.2.1	SL2.40ch07:60575268-60584663	R	9396	15	2442	813	5.86	91.12	Nuclear
										Cytoplasmic
SlRaf15-2	Solyc12g013980.1.1	SL2.40ch12:4817640-4824070	F	6431	9	1176	391	6.12	44.95	Cytoplasmic
										Nuclear
SlRaf13	Solyc02g076780.2.1	SL2.40ch02:36457518-36480448	F	22931	14	2226	741	6.75	82.34	Nuclear
										Cytoplasmic
SlRaf2	Solyc01g097980.2.1	SL2.40ch01:80387053-80397552	F	10500	13	2949	982	6.04	107.34	Nuclear
SlRaf3	Solyc08g065250.2.1	SL2.40ch08:50338759-50349315	F	10557	13	2241	746	5.76	83.39	Cytoplasmic
SlRaf5-1	Solyc03g119140.2.1	SL2.40ch03:61887750-61899889	F	12140	13	3096	1031	5.34	112.44	Nuclear
										Chloroplast
SlRaf5-2	Solyc06g068980.2.1	SL2.40ch06:39180022-39189671	R	9650	15	2970	989	5.73	107.85	Nuclear
SlRaf6	Solyc04g076480.2.1	SL2.40ch04:58934431-58942365	R	7935	15	2877	958	6.46	107.39	Nuclear
										Cytoplasmic
SlRaf1-1	Solyc10g083610.1.1	SL2.40ch10:62712543-62724546	R	12004	15	2490	829	6.03	91.87	Nuclear
SlRaf1-2	Solyc10g085570.1.1	SL2.40ch10:64008641-64021548	F	12908	15	2382	793	5.66	88.54	Nuclear
SlRaf1-3	Solyc09g009090.2.1	SL2.40ch09:2427384-2442527	F	15144	16	2514	837	5.8	91.97	Nuclear
										Chloroplast
										Cytoplasmic
Potato
StRaf30-1	PGSC0003DMP400032486	ST3.10ch01:88,067,669..88,076,117	F	8449	16	1695	564	6.02	63.66	Cytoplasmic
	PGSC0003DMT400047982
StRaf30-2	PGSC0003DMP400032487	ST3.10ch01:88,067,669..88,076,117	F	8449	11	1158	385	5.92	43.73	Cytoplasmic
	PGSC0003DMT400047983
StRaf30-3	PGSC0003DMP400032978	ST3.10ch10:47,538,245..47,548,107	R	9863	16	1689	562	5.89	63.4	Cytoplasmic
	PGSC0003DMT400048730									Nuclear
StRaf21-1	PGSC0003DMP400015249	ST3.10ch02:19,577,560..19,586,674	R	9115	10	972	323	8.62	36.58	Cytoplasmic
	PGSC0003DMT400022377
StRaf21-2	PGSC0003DMP400001518	ST3.10ch04:59,107,036..59,116,060	R	9025	8	873	290	6.31	32.89	Cytoplasmic
	PGSC0003DMT400002088
StRaf37	PGSC0003DMP400022423	ST3.10ch02:40,842,380..40,849,023	R	6644	6	1119	372	5.49	41.82	Nuclear
	PGSC0003DMT400032959									Plasma Membrane
										Cytoplasmic
StRaf34	PGSC0003DMP400022330	ST3.10ch02:47,466,899..47,471,435	F	4537	6	1062	353	6.9	39.89	Cytoplasmic
	PGSC0003DMT400032824
StRaf28-1	PGSC0003DMP400005270	ST3.10ch12:3,046,876..3,055,218	R	8343	2	1203	400	7.21	44.79	Chloroplast
	PGSC0003DMT400007579									Nuclear
StRaf28-2	PGSC0003DMP400005269	ST3.10ch12:3,046,876..3,054,047	R	8343	2	1203	400	7.21	44.79	Chloroplast
	PGSC0003DMT400007578									Nuclear
StRaf28-3	PGSC0003DMP400005268	ST3.10ch12:3,034,851..3,042,007	R	7157	2	1116	371	7.72	41.39	Cytoplasmic
	PGSC0003DMT400007577
StRaf43-1	PGSC0003DMP400051724	ST3.10ch02:33,903,937..33,907,194	R	3258	3	1515	504	9.36	57.32	Mitochondrial
	PGSC0003DMT400076363									Nuclear
StRaf43-2	PGSC0003DMP400051723	ST3.10ch02:33,903,937..33,907,194	R	3258	3	1515	504	9.36	57.32	Mitochondrial
	PGSC0003DMT400076362									Nuclear
StRaf43-3	PGSC0003DMP400022690	ST3.10ch03:1,881,905..1,885,819	R	3915	3	1455	484	9.43	54.81	Mitochondrial
	PGSC0003DMT400033356									Nuclear
StRaf19-1	PGSC0003DMP400042375	ST3.10ch03:54,329,272..54,335,041	F	5770	3	1056	351	8.41	39.74	Cytoplasmic
	PGSC0003DMT400062959
StRaf19-2	PGSC0003DMP400040851	ST3.10ch04:8,702,394..8,706,151	F	3758	3	1023	340	8.86	38.85	Nuclear
	PGSC0003DMT400060698									Cytoplasmic
StRaf19-3	PGSC0003DMP400023464	ST3.10ch11:732,091..736,534	R	4444	3	1017	338	8.78	38.6	Cytoplasmic
	PGSC0003DMT400034519									Plasma Membrane
										Nuclear
StRaf24	PGSC0003DMP400018472	ST3.10ch02:27,408,577..27,417,302	F	8726	8	3876	1291	5.51	87.1	Nuclear
	PGSC0003DMT400027083									Cytoplasmic
StRaf18	PGSC0003DMP400038226	ST3.10ch07:56,645,246..56,654,218	R	8973	8	3351	1116	5.41	90.24	Nuclear
	PGSC0003DMT400056866
StRaf16-1	PGSC0003DMP400051585	ST3.10ch09:58,282,864..58,284,742	F	6208	5	594	197	9.3	22.12	Mitochondrial
	PGSC0003DMT400076174									Nuclear
StRaf16-2	PGSC0003DMP400051583	ST3.10ch09:58,278,588..58,284,795	F	6208	8	3696	1231	5.47	92.98	Nuclear
	PGSC0003DMT400076172
StRaf16-3	PGSC0003DMP400051584	ST3.10ch09:58,278,588..58,284,795	F	6208	8	3705	1234	5.51	93.33	Nuclear
	PGSC0003DMT400076173
StRaf35	PGSC0003DMP400032675	ST3.10ch07:2,494,232..2,501,308	R	7077	8	3300	1099	5.45	87.6	Nuclear
	PGSC0003DMT400048262
StRaf48	PGSC0003DMP400034579	ST3.10ch04:19,952,796..19,954,679	F	1884	5	1053	350	8.91	39.75	Cytoplasmic
	PGSC0003DMT400051283
StRaf26-1	PGSC0003DMP400055439	ST3.10ch09:54,125,149..54,130,512	R	5364	6	1182	393	8.6	44.08	Nuclear
	PGSC0003DMT400082064									Cytoplasmic
StRaf26-2	PGSC0003DMP400055438	ST3.10ch09:54,125,149..54,130,512	R	5364	7	1188	395	8.75	44.52	Nuclear
	PGSC0003DMT400082063									Cytoplasmic
StRaf33-1	PGSC0003DMP400048761	ST3.10ch12:38,424,876..38,429,726	R	4851	6	1107	368	8.25	41.44	Cytoplasmic
	PGSC0003DMT400072132
StRaf33-2	PGSC0003DMP400048760	ST3.10ch12:38,424,876..38,427,087	R	4851	4	693	230	8.5	25.93	Nuclear
	PGSC0003DMT400072131									Cytoplasmic
StRaf33-3	PGSC0003DMP400048763	ST3.10ch12:38,424,876..38,427,087	R	4851	3	549	182	8.01	20.59	Extracellular
	PGSC0003DMT400072134									Nuclear
										Cytoplasmic
StRaf38-1	PGSC0003DMP400046877	ST3.10ch06:52,259,766..52,264,521	R	4756	6	1179	392	7.94	43.88	Nuclear
	PGSC0003DMT400069449
StRaf38-2	PGSC0003DMP400042573	ST3.10ch03:54,141,229..54,146,751	R	5523	6	1176	391	7.93	43.35	Nuclear
	PGSC0003DMT400063241									Cytoplasmic
StRaf17	PGSC0003DMP400049296	ST3.10ch05:82,985..88,504	R	5520	11	1308	435	8.16	49.15	Mitochondrial
	PGSC0003DMT400072865									Cytoplasmic
StRaf11-1	PGSC0003DMP400041534	ST3.10ch01:45,775,002..45,784,194	F	9193	13	2295	764	6.37	85.34	Nuclear
	PGSC0003DMT400061715
StRaf11-2	PGSC0003DMP400041532	ST3.10ch01:45,775,323..45,783,532	F	9193	14	2451	816	6.34	91.28	Nuclear
	PGSC0003DMT400061713									Cytoplasmic
StRaf11-3	PGSC0003DMP400008315	ST3.10ch12:59,981,532..59,988,598	R	7067	13	2307	768	6.4	85.29	Nuclear
	PGSC0003DMT400011959
StRaf12-1	PGSC0003DMP400005454	ST3.10ch08:54,167,992..54,172,882	F	4891	14	2001	666	7.99	74.17	Nuclear
	PGSC0003DMT400007850
StRaf12-2	PGSC0003DMP400010240	ST3.10ch08:4,737,380..4,744,925	F	7546	15	2163	720	6.19	80.31	Nuclear
	PGSC0003DMT400014794
StRaf12-3	PGSC0003DMP400010239	ST3.10ch08:4,737,380..4,744,925	F	7546	13	2001	666	6.16	74.27	Nuclear
	PGSC0003DMT400014793
StRaf15	PGSC0003DMP400026864	ST3.10ch12:461,127..465,144	R	4018	7	1008	335	5.57	38.54	Cytoplasmic
	PGSC0003DMT400039618									Plasma Membrane
StRaf5	PGSC0003DMP400050133	ST3.10ch06:50,684,086..50,690,253	R	11003	11	2007	668	5.99	72.85	Nuclear
	PGSC0003DMT400074061
StRaf6-1	PGSC0003DMP400016491	ST3.10ch04:65,103,668..65,112,595	R	8928	15	2865	954	6.46	106.91	Nuclear
	PGSC0003DMT400024156									Cytoplasmic
StRaf6-2	PGSC0003DMP400016489	ST3.10ch04:65,104,066..65,112,038	R	8928	14	2796	931	6.7	104.17	Nuclear
	PGSC0003DMT400024154
StRaf6-3	PGSC0003DMP400016490	ST3.10ch04:65,103,668..65,112,595	R	8928	13	2715	904	6.34	101.58	Nuclear
	PGSC0003DMT400024155									Cytoplasmic
StRaf1	PGSC0003DMP400014715	ST3.10ch10:53,333,706..53,352,295	R	18590	15	2379	792	5.68	88.22	Nuclear
	PGSC0003DMT400021612
Eggplant
SmRaf30	Sme2.5_00254.1_g00017.1	-	-	-	16	1866	621	6.05	70.44	Cytoplasmic
										Nuclear
SmRaf21-1	Sme2.5_06643.1_g00005.1	-	-	-	9	828	275	5.65	31.23	Cytoplasmic
SmRaf21-2	Sme2.5_01645.1_g00005.1	-	-	-	17	1875	624	5.5	70.87	Cytoplasmic
										Nuclear
SmRaf21-3	Sme2.5_03546.1_g00006.1	-	-	-	14	1587	528	5.79	59.52	Cytoplasmic
SmRaf21-4	Sme2.5_04324.1_g00003.1	-	-	-	16	1641	546	5.2	61.48	Cytoplasmic
SmRaf31	Sme2.5_06792.1_g00003.1	-	-	-	9	1272	423	6.32	47.47	Cytoplasmic
SmRaf34	Sme2.5_01371.1_g00008.1	-	-	-	6	1062	353	7.69	39.85	Cytoplasmic
SmRaf43-1	Sme2.5_02187.1_g00010.1	-	-	-	4	1404	467	9.37	53.15	Mitochondrial
										Nuclear
SmRaf43-2	Sme2.5_23261.1_g00001.1	-	-	-	3	1518	505	9.31	57.5	Mitochondrial
										Nuclear
SmRaf43-3	Sme2.5_00917.1_g00006.1	-	-	-	4	1479	492	9.29	55.78	Mitochondrial
										Nuclear
SmRaf19-1	Sme2.5_00431.1_g00011.1	-	-	-	4	1194	397	7.91	44.77	Cytoplasmic
SmRaf19-2	Sme2.5_00499.1_g00017.1	-	-	-	3	1050	349	8.72	39.88	Nuclear
SmRaf24	Sme2.5_00781.1_g00006.1	-	-	-	8	3897	1298	5.46	87.72	Nuclear
										Cytoplasmic
SmRaf18	Sme2.5_01945.1_g00006.1	-	-	-	9	3642	1213	5.72	101.73	Nuclear
SmRaf16	Sme2.5_00737.1_g00005.1	-	-	-	7	3723	1240	5.18	93.7	Nuclear
SmRaf42	Sme2.5_00269.1_g00008.1	-	-	-	10	4194	1397	5.56	87.07	Cytoplasmic
SmRaf35	Sme2.5_00096.1_g00010.1	-	-	-	8	3282	1093	5.43	87	Nuclear
SmRaf48	Sme2.5_03258.1_g00002.1	-	-	-	6	858	285	6.54	32.24	Cytoplasmic
SmRaf38-1	Sme2.5_01887.1_g00002.1	-	-	-	6	1191	396	7.95	44.33	Nuclear
SmRaf38-2	Sme2.5_04323.1_g00008.1	-	-	-	6	1173	390	8.19	43.3	Nuclear
										Cytoplasmic
SmRaf17-1	Sme2.5_00219.1_g00017.1	-	-	-	11	1281	426	8.72	48.12	Mitochondrial
SmRaf17-2	Sme2.5_02276.1_g00001.1	-	-	-	12	1461	486	6.93	54.53	Cytoplasmic
SmRaf27	Sme2.5_04959.1_g00002.1	-	-	-	13	1452	483	6.54	54.73	Cytoplasmic
SmRaf12-1	Sme2.5_13578.1_g00001.1	-	-	-	15	2334	777	6.78	86.95	Nuclear
SmRaf12-2	Sme2.5_00058.1_g00012.1	-	-	-	15	2163	720	6.34	80.47	Nuclear
SmRaf6	Sme2.5_00168.1_g00009.1	-	-	-	15	2871	956	6.35	107.07	Cytoplasmic
										Nuclear
SmRaf1-1	Sme2.5_00311.1_g00012.1	-	-	-	16	2565	854	5.67	94.58	Nuclear
										Cytoplasmic
SmRaf1-2	Sme2.5_00292.1_g00006.1	-	-	-	21	2988	995	5.88	110.4	Nuclear
										Cytoplasmic
Pepper
CaRaf30	CA08g19620	Pepper.v.1.55.chr08:145049094..145055280	R	6187	16	1701	566	5.79	63.92	Cytoplasmic
CaRaf21-1	CA02g20590	Pepper.v.1.55.chr02:154560116..154573591	R	13476	15	1491	496	5.29	55.6	Cytoplasmic
CaRaf21-2	CA12g17800	Pepper.v.1.55.chr12:221069510..221072250	F	2741	10	1065	354	6.24	40.12	Cytoplasmic
CaRaf21-3	CA04g13140	Pepper.v.1.55.chr04:181546303..181557621	R	11319	15	1614	537	5.29	60.82	60822.8
CaRaf37	CA02g22960	Pepper.v.1.55.chr02:158247599..158256318	R	8720	6	1101	366	5.78	41.09	Nuclear
										Cytoplasmic
										Plasma Membrane
CaRaf31	CA09g09570	Pepper.v.1.55.chr09:118733867..118737161	R	3295	5	939	312	7.66	35.31	Cytoplasmic
CaRaf34	CA02g30080	Pepper.v.1.55.chr02:169354902..169358441	F	3540	6	1062	353	7.19	39.65	Cytoplasmic
CaRaf28-1	CA07g07640	Pepper.v.1.55.chr07:106455044..106469502	F	14459	2	1239	412	7.68	46.04	Nuclear
										Mitochondrial
CaRaf28-2	CA09g17280	Pepper.v.1.55.chr09:250661422..250667769	F	6348	2	1218	405	6.27	44.64	Chloroplast
CaRaf19-1	CA03g28390	Pepper.v.1.55.chr03:241223662..241229513	F	5852	3	1056	351	7.96	39.73	Cytoplasmic
CaRaf19-2	CA05g01520	Pepper.v.1.55.chr05:2811329..2816070	F	4742	3	1140	379	9.21	43.12	Nuclear
CaRaf19-3	CA12g00980	Pepper.v.1.55.chr12:2367203..2371181	F	3979	3	1017	338	8.77	38.62	Nuclear
										Cytoplasmic
CaRaf24	CA02g10400	Pepper.v.1.55.chr02:129897219..129903877	R	6659	8	3894	1297	5.65	142.53	Nuclear
CaRaf16	CA03g02240	Pepper.v.1.55.chr03:4495997..4501461	R	5465	9	3597	1198	5.51	133.17	Nuclear
CaRaf42	CA07g02830	Pepper.v.1.55.chr07:11959263..11973392	R	14130	9	4194	1397	5.37	150.49	Nuclear
CaRaf35	CA07g00400	Pepper.v.1.55.chr07:1473018..1480134	R	7117	8	3309	1102	5.22	122.48	Nuclear
CaRaf48-1	CA12g03060	Pepper.v.1.55.chr12:6904326..6905330	R	1005	1	1005	334	9	37.8	Nuclear
										Cytoplasmic
CaRaf48-2	CA12g03040	Pepper.v.1.55.chr12:6747905..6748909	F	1005	1	1005	334	9.09	37.87	Nuclear
										Cytoplasmic
CaRaf26	CA03g07090	Pepper.v.1.55.chr03:20975297..20980021	R	4725	6	1206	401	8.48	45.34	Nuclear
CaRaf38-1	CA04g09800	Pepper.v.1.55.chr04:105549852..105550511	R	660	3	462	153	6.31	17.31	Nuclear
										Cytoplasmic
										Extracellular
CaRaf38-2	CA06g19580	Pepper.v.1.55.chr06:219477979..219481953	R	3975	6	1188	395	8.18	44.15	Nuclear
CaRaf38-3	CA03g28310	Pepper.v.1.55.chr03:240946884..240952110	R	5227	7	1089	362	7.09	40.58	Nuclear
										Cytoplasmic
CaRaf17	CA11g03840	Pepper.v.1.55.chr11:14267942..14280067	R	12126	11	1335	444	-	-	Mitochondrial
										Cytoplasmic
CaRaf11-1	CA01g16020	Pepper.v.1.55.chr01:97195047..97207948	F	12902	13	2274	757	6.76	84.77	Nuclear
										Mitochondrial
CaRaf11-2	CA12g21220	Pepper.v.1.55.chr12:233005539..233011740	R	6202	13	2325	774	6.47	85.79	Nuclear
CaRaf12-1	CA01g03200	Pepper.v.1.55.chr01:5105928..5109747	R	3820	14	1929	642	8.86	71.83	Nuclear
CaRaf12-2	CA01g34050	Pepper.v.1.55.chr01:271468910..271476433	F	7524	15	2190	729	5.91	80.95	Nuclear
CaRaf15	CA00g44070	-	-	-	-	2445	814	5.82	91.42	Nuclear
										Cytoplasmic
CaRaf13	CA02g14110	Pepper.v.1.55.chr02:141746918..141750015	F	3098	4	627	208	7.53	23.54	Plasma Membrane
CaRaf2	CA08g10900	Pepper.v.1.55.chr08:129657038..129663897	F	6860	10	1956	651	7.67	71.63	Nuclear
CaRaf3	CA08g05330	Pepper.v.1.55.chr08:98888385..98898218	R	9834	11	1692	563	6	62.6	Cytoplasmic
										Nuclear
CaRaf5-1	CA03g33190	Pepper.v.1.55.chr03:251371769..251384766	F	12998	13	3072	1023	5.33	111.23	Chloroplast
										Nuclear
CaRaf5-2	CA06g17750	Pepper.v.1.55.chr06:215951046..215962158	R	11113	16	3117	1038	5.93	114.77	Nuclear
CaRaf6	CA04g16370	Pepper.v.1.55.chr04:205704824..205712952	R	8129	15	3264	1087	6.48	121.55	Cytoplasmic
										Nuclear
CaRaf1-1	CA10g16330	Pepper.v.1.55.chr10:219621072..219626104	F	5033	10	1167	388	7.74	44.08	Mitochondrial
										Nuclear
CaRaf1-2	CA10g12690	Pepper.v.1.55.chr10:194358441..194374179	F	15739	15	2286	761	5.73	84.24	Nuclear
CaRaf1-3	CA09g01440	Pepper.v.1.55.chr09:2937653..2952335	F	14683	15	2532	843	5.85	92.52	Chloroplast
										Nuclear
										Cytoplasmic
Coffee
CcRaf30	Cc09_g10420	chr9:21779576..21788278	R	8703	16	1713	570	6.02	64.53	Cytoplasmic
CcRaf21-1	Cc07_g11410	chr7:8360651..8369025	F	8375	16	1728	575	5.88	65.52	Cytoplasmic
										Nuclear
CcRaf21-2	Cc10_g01060	chr10:831891..839236	R	7346	16	1698	565	6.09	63.92	Cytoplasmic
CcRaf21-3	Cc10_g14540	chr10:25215978..25227404	R	11427	16	1659	552	5.15	62.26	Cytoplasmic
CcRaf37	Cc07_g09160	chr7:6715505..6720365	F	4861	6	942	313	8.88	34.97	Cytoplasmic
CcRaf31	Cc06_g00450	chr6:304999..309179	R	4181	6	1122	373	7.61	41.82	Cytoplasmic
										Nuclear
CcRaf34	Cc07_g01560	chr7:1074302..1078469	R	4168	6	1050	349	7.16	39.1	Cytoplasmic
CcRaf28	Cc06_g23750	chr6:36937017..36942396	R	5380	2	1239	412	7.14	46.28	Nuclear
										Mitochondrial
										Cytoplasmic
CcRaf43-1	Cc02_g13450	chr2:11604156..11607066	F	2911	3	1518	505	9.37	57.4	Mitochondrial
CcRaf43-2	Cc02_g32470	chr2:43690360..43691475	R	1116	2	1062	353	9.33	40.25	Mitochondrial
CcRaf19-1	Cc04_g13940	chr4:19737734..19745954	F	8221	3	906	301	7.17	34.16	Cytoplasmic
CcRaf19-2	Cc09_g01010	chr9:740047..743585	R	3539	3	1125	374	9.12	42.63	Nuclear
CcRaf18	Cc05_g16450	chr5:29032099..29039574	R	7476	10	3480	1159	5.09	95.06	Nuclear
										Cytoplasmic
CcRaf26	Cc03_g04110	chr3:3095666..3099244	R	3579	6	1215	404	7.47	44.82	Cytoplasmic
CcRaf39	Cc01_g19140	chr1:36107929..36111697	F	3769	6	1179	392	7.92	43.92	Cytoplasmic
CcRaf38-1	Cc07_g02320	chr7:1579300..1583763	F	4464	6	1152	383	6.33	42.36	Cytoplasmic
										Nuclear
CcRaf38-2	Cc04_g13680	chr4:18863209..18869783	R	6575	6	1242	413	7.94	45.81	Nuclear
CcRaf17	Cc11_g12640	chr11:29618498..29624906	F	6409	11	1320	439	7.79	49.47	Mitochondrial
										Cytoplasmic
CcRaf27	Cc02_g37890	chr2:52685890..52691452	R	5563	13	1281	426	7.23	48.34	Cytoplasmic
										Mitochondrial
CcRaf8	Cc03_g00770	chr3:569174..574876	R	5703	14	2436	811	6.7	89.48	Nuclear
CcRaf12	Cc08_g14110	chr8:29158836..29164248	F	5413	16	2268	755	6.22	83.7	Nuclear
CcRaf15	Cc05_g08400	chr5:23030571..23041094	R	10524	16	2433	810	5.75	91.24	Nuclear
CcRaf2	Cc02_g31340	chr2:39762391..39774624	R	12234	13	2970	989	5.75	108.09	Nuclear
CcRaf3	Cc08_g10580	chr8:25398430..25407244	R	8815	14	2856	951	5.65	105.17	Nuclear
CcRaf6	Cc10_g08440	chr10:7722022..7730542	R	8521	15	2865	954	6.43	106.44	Nuclear
										Cytoplasmic
CcRaf1	Cc06_g05240	chr6:4139393..4148338	F	8946	16	2382	793	6.08	88.05	Nuclear
