# Supplementary material for: In silico analysis reveals widespread presence of three gene families, MAPK, MAPKK and MAPKKK, of the MAPK cascade from crop plants of Solanaceae in comparison to the distantly-related syntenic species from Rubiaceae, coffee
Source: PeerJ. 2017 Jun 6;5:e3255. doi: 10.7717/peerj.3255 (PMC5463992; doi:10.7717/peerj.3255)
Supplement: Table S6 [file peerj-05-3255-s026.xlsx]

## Sheet: Additional File 1
Plant/Family	Sl	St	Sm	Ca	Cc
MPK	Solyc06g068990.2.1, Solyc12g040680.1.1, Solyc01g080240.2.1, Solyc04g007710.2.1, Solyc05g008020.2.1, Solyc07g056350.2.1, Solyc10g007500.2.1, Solyc07g062080.2.1, Solyc04g080730.2.1, Solyc02g084870.2.1, Solyc06g005170.2.1, Solyc11g072630.1.1, Solyc08g081490.2.1, Solyc01g094960.2.1	PGSC0003DMP400036823, PGSC0003DMP400036824, PGSC0003DMP400012516, PGSC0003DMP400012517, PGSC0003DMP400030312, PGSC0003DMP400030311, PGSC0003DMP400030310, PGSC0003DMP400007748, PGSC0003DMP400007750, PGSC0003DMP400010570, PGSC0003DMP400010572, PGSC0003DMP400053050, PGSC0003DMP400004339, PGSC0003DMP400050161, PGSC0003DMP400006600, PGSC0003DMP400006283, PGSC0003DMP400052344, PGSC0003DMP400052345, PGS…	Sme2.5_05755.1_g00007.1, Sme2.5_04459.1_g00002.1, Sme2.5_00256.1_g00002.1, Sme2.5_00629.1_g00003.1, Sme2.5_02990.1_g00003.1, Sme2.5_01196.1_g00004.1, Sme2.5_01907.1_g00007.1, Sme2.5_00135.1_g00022.1, Sme2.5_01583.1_g00001.1, Sme2.5_01704.1_g00002.1, Sme2.5_02168.1_g00005.1, Sme2.5_01256.1_g00004.1	CA08g07540, CA01g02140, CA11g13970, CA06g06270, CA02g22080, CA04g21490, CA10g01850, CA07g16590, CA05g08630, CA00g57490, CA07g15380, CA12g10140, CA01g24290, CA06g17760	Cc00_g17870, Cc08_g15160, Cc01_g11870, Cc01_g11790, Cc03_g14980, Cc07_g10000, Cc03_g12110, Cc05_g10580, Cc05_g09440, Cc03_g02990, Cc11_g08590, Cc04_g06490
MKK	Solyc03g097920.1.1, Solyc03g123800.1.1, Solyc03g019850.2.1, Solyc12g009020.1.1	PGSC0003DMP400000549, PGSC0003DMP400026685, PGSC0003DMP400026683, PGSC0003DMP400026684, PGSC0003DMP400016192, PGSC0003DMP400056215	Sme2.5_00088.1_g00017.1, Sme2.5_09230.1_g00001.1, Sme2.5_00861.1_g00010.1, Sme2.5_01917.1_g00010.1	CA03g22790, CA03g36820, CA03g23860, CA00g74230, CA00g92940	Cc04_g09350, Cc04_g00500, Cc00_g04720, Cc06_g11750
MEKK-like	Solyc07g051880.1.1, Solyc07g051860.1.1, Solyc07g051930.1.1, Solyc07g051920.1.1, Solyc07g051870.1.1, Solyc07g051890.1.1, Solyc07g064820.1.1, Solyc02g090430.2.1, Solyc02g065110.2.1, Solyc12g088940.1.1, Solyc04g079400.2.1, Solyc11g006000.1.1, Solyc08g081210.2.1, Solyc06g036080.2.1, Solyc03g025360.2.1, Solyc01g079750.2.1, Solyc11g033270.1.1	PGSC0003DMP400026414, PGSC0003DMP400026412, PGSC0003DMP400026415, PGSC0003DMP400026413, PGSC0003DMP400062651, PGSC0003DMP400038451, PGSC0003DMP400029864, PGSC0003DMP400029865, PGSC0003DMP400027065, PGSC0003DMP400027064, PGSC0003DMP400027066, PGSC0003DMP400027063, PGSC0003DMP400017816, PGSC0003DMP400017815, PGSC0003DMP400001453, PGSC0003DMP400001454, PGSC0003DMP400021570, PGSC0003DMP400027723, PGS…	Sme2.5_08118.1_g00001.1, Sme2.5_00836.1_g00002.1, Sme2.5_00798.1_g00002.1, Sme2.5_11638.1_g00002.1, Sme2.5_00670.1_g00005.1, Sme2.5_03743.1_g00002.1, Sme2.5_01620.1_g00009.1, Sme2.5_00401.1_g00001.1, Sme2.5_03412.1_g00007.1, Sme2.5_06273.1_g00002.1, Sme2.5_06987.1_g00002.1, Sme2.5_06987.1_g00001.1, Sme2.5_06987.1_g00003.1, Sme2.5_09222.1_g00004.1	CA07g11570, CA07g11550, CA07g11510, CA07g11520, CA07g11540, CA07g11530, CA07g19730, CA02g25750, CA02g01650, CA12g16910, CA04g19330, CA03g18490, CA06g07490, CA04g12810, CA12g08170, CA08g11840, CA01g24590	Cc01_g14440, Cc06_g20870, Cc05_g04090, Cc02_g23420, Cc07_g18450, Cc02_g02620, Cc10_g03820, Cc07_g05770, Cc08_g03100, Cc03_g03360, Cc11_g03550, Cc02_g22220
Raf-like	Solyc02g093410.2.1, Solyc09g018060.2.1, Solyc02g085620.2.1, Solyc04g071120.2.1, Solyc12g094410.1.1, Solyc02g083290.2.1, Solyc10g055720.1.1, Solyc01g111880.2.1, Solyc07g042680.2.1, Solyc07g042890.2.1, Solyc12g009340.1.1, Solyc04g014690.2.1, Solyc11g012050.1.1, Solyc03g114310.2.1, Solyc02g078140.2.1, Solyc03g006400.2.1, Solyc12g013980.1.1, Solyc07g055130.2.1, Solyc02g076780.2.1, Solyc12g099250.1.1,…	PGSC0003DMP400050133, PGSC0003DMP400026864, PGSC0003DMP400014715, PGSC0003DMP400016490, PGSC0003DMP400016491, PGSC0003DMP400016489, PGSC0003DMP400010240, PGSC0003DMP400010239, PGSC0003DMP400005454, PGSC0003DMP400041534, PGSC0003DMP400041532, PGSC0003DMP400008315, PGSC0003DMP400001518, PGSC0003DMP400015249, PGSC0003DMP400032978, PGSC0003DMP400032486, PGSC0003DMP400032487, PGSC0003DMP400022330, PGS…	Sme2.5_00254.1_g00017.1, Sme2.5_06643.1_g00005.1, Sme2.5_01645.1_g00005.1, Sme2.5_03546.1_g00006.1, Sme2.5_04324.1_g00003.1, Sme2.5_06792.1_g00003.1, Sme2.5_01371.1_g00008.1, Sme2.5_00499.1_g00017.1, Sme2.5_00431.1_g00011.1, Sme2.5_00917.1_g00006.1, Sme2.5_02187.1_g00010.1, Sme2.5_23261.1_g00001.1, Sme2.5_00096.1_g00010.1, Sme2.5_00269.1_g00008.1, Sme2.5_00737.1_g00005.1, Sme2.5_00781.1_g00006.1,…	CA03g33190, CA06g17750, CA08g05330, CA08g10900, CA04g16370, CA10g16330, CA09g01440, CA10g12690, CA02g14110, CA00g44070, CA01g34050, CA01g03200, CA01g16020, CA12g21220, CA08g19620, CA02g20590, CA12g17800, CA04g13140, CA02g22960, CA09g09570, CA02g30080, CA07g07640, CA09g17280, CA03g28390, CA12g00980, CA05g01520, CA12g03060, CA12g03040, CA03g07090, CA04g09800, CA03g28310, CA06g19580, CA11g03840, CA0…	Cc02_g31340, Cc08_g10580, Cc06_g05240, Cc10_g08440, Cc05_g08400, Cc08_g14110, Cc03_g00770, Cc07_g09160, Cc07_g01560, Cc06_g00450, Cc10_g14540, Cc10_g01060, Cc07_g11410, Cc09_g10420, Cc02_g13450, Cc02_g32470, Cc04_g13940, Cc09_g01010, Cc06_g23750, Cc05_g16450, Cc03_g04110, Cc01_g19140, Cc04_g13680, Cc07_g02320, Cc11_g12640, Cc02_g37890
ZIK	Solyc01g097840.2.1, Solyc09g076000.2.1, Solyc09g018170.2.1, Solyc06g082470.2.1, Solyc07g065250.2.1, Solyc06g071800.2.1, Solyc03g112140.2.1, Solyc01g096170.2.1, Solyc10g009350.2.1, Solyc08g082980.2.1	PGSC0003DMP400021668, PGSC0003DMP400021667, PGSC0003DMP400000268, PGSC0003DMP400031703, PGSC0003DMP400031701, PGSC0003DMP400031704, PGSC0003DMP400038403, PGSC0003DMP400038402, PGSC0003DMP400053006, PGSC0003DMP400053004, PGSC0003DMP400053005, PGSC0003DMP400007838, PGSC0003DMP400039026, PGSC0003DMP400052402, PGSC0003DMP400052403, PGSC0003DMP400052401	Sme2.5_01216.1_g00012.1, Sme2.5_00090.1_g00023.1, Sme2.5_02101.1_g00005.1, Sme2.5_00100.1_g00013.1, Sme2.5_16245.1_g00001.1	CA04g04090, CA07g20150, CA03g17400, CA08g10780, CA06g19890, CA00g64570	Cc02_g31620, Cc03_g03730, Cc05_g14630, Cc01_g15230, Cc04_g11420, Cc02_g03530, Cc02_g39670, Cc08_g16610
