# Supplementary material for: In silico analysis reveals widespread presence of three gene families, MAPK, MAPKK and MAPKKK, of the MAPK cascade from crop plants of Solanaceae in comparison to the distantly-related syntenic species from Rubiaceae, coffee
Source: PeerJ. 2017 Jun 6;5:e3255. doi: 10.7717/peerj.3255 (PMC5463992; doi:10.7717/peerj.3255)
Supplement: Table S8 [file peerj-05-3255-s028.xlsx]

## Sheet: Sheet1
No. of Introns	No. of genes
	Sl	St	Sm	Ca	Cc
MPK
Group A
5	1	1	−	1	1
4	−	1	−	−	1
Group B
5	3	3	2	3	3
4	−	−	1	1	−
Group C
1	2	2	2	2	2
Group D
10	4	3	2	−	1
9	4	7	4	−	4
8	−	1	1	4	−
7	−	1	−	1	−
6	−	1	−	1	−
5	−	−	−	−	−
4	−	−	−	1	−
3	−	1	−	−	−
MKK
Group A
7	1	1	1	−	1
Group B
10	−	−	1	−	−
8	1	1	−	−	1
6	−	−	−	1	−
5	−	1	−	−	−
4	−	1	−	−	−
Group C
Single exon	1	1	1	1	1
Group D
Single exon	1	1	1	1	1
MAPKKK
MEKK-like
A1
7	−	−	−	−	1
A2
12	1	−	1	−	−
11	1	−	2	−	1
10	3	5	3	4	2
9	2	4	−	1	−
8	−	3	−	3	1
7	−	1	1	−	−
5	−	−	−	−	1
2	1	−	−	−	−
A3
16	1	1	−	1	2
15	−	−	−	1	−
A4
23	1	−	−	−	−
Cluster 5
1	−	−	1	−	−
Single exon	7	8	5	7	4
Raf-like
B1
15	−	−	−	−	1
14	1	−	−	−	−
13	1	−	−	−	−
8	1	−	−	−	−
4	−	1	−	−	−
3	−	−	−	1	−
B2
15	−	−	−	−	1
14	2	1	2	2	−
13	−	2	−	1	1
12	2	3	−	2	−
B3
20	−	−	1	−	−
15	1	1	1	1	1
14	4	2	1	3	1
13	−	1	−	−	1
12	3	1	−	1	1
10	−	−	−	1	−
9	−	−	−	2	−
B4
9	−	−	1	−	1
8	2	−	1	2	−
7	1	5	2	2	−
6	−	−	1	−	−
5	2	−	−	−	−
4	−	1	−	−	−
C1
12	1	−	1	−	1
11	−	−	1	−	−
10	2	1	1	1	1
C2
16	−	−	1	−	−
15	4	2	2	1	4
14	1	−	−	1	−
13	−	−	1	−	−
10	−	1	−	1	−
8	−	−	1	−	−
9	−	1	−	1	−
7	−	1	−	−	−
C3
8	−	−	1	−	−
5	2	1	1	1	2
4	−	−	−	1	−
C4
5	1	1	−	1	1
C5
3	−	−	3	−	−
2	5	6	2	3	3
1	−	−	−	−	1
C6
1	3	3	−	2	1
C7
6	1	1	−	1	−
5	4	4	3	2	4
4	−	1	−	−	−
3	−	1	−	1	−
2	−	1	−	1	−
Single exon	−	−	−	2	−
ZIK
Cluster 1
7	2	1	−	−	1
6	1	1	−	−	1
5	−	1	−	−	−
Cluster 2
7	−	−	1	−	1
6	2	2	1	2	1
5	−	−	−	−	−
4	−	1	−	−	−
3	−	1	−	−	−
Cluster 3
3	−	−	−	1	1
2	−	2	−	−	−
1	1	−	1	−	1
Single exon	−	−	−	−	1
Cluster 4
6	2	2	1	1	1
4	−	2	−	−	−
Cluster 5
8	1	2	−	−	1
7	1	1	−	−	−
5	−	−	1	1	−
